# Supplementary material for: Effect of sodium citrate on the shape and photoluminescence properties of CaWO4:Eu3+ superstructures synthesized by the hydrothermal method
Source: Royal Society of Chemistry journal article supplement (doi:10.1039/c3ce40872h), 2013-01-01
Supplement: c3ce40872h.pdf [file c3ce40872h.pdf]

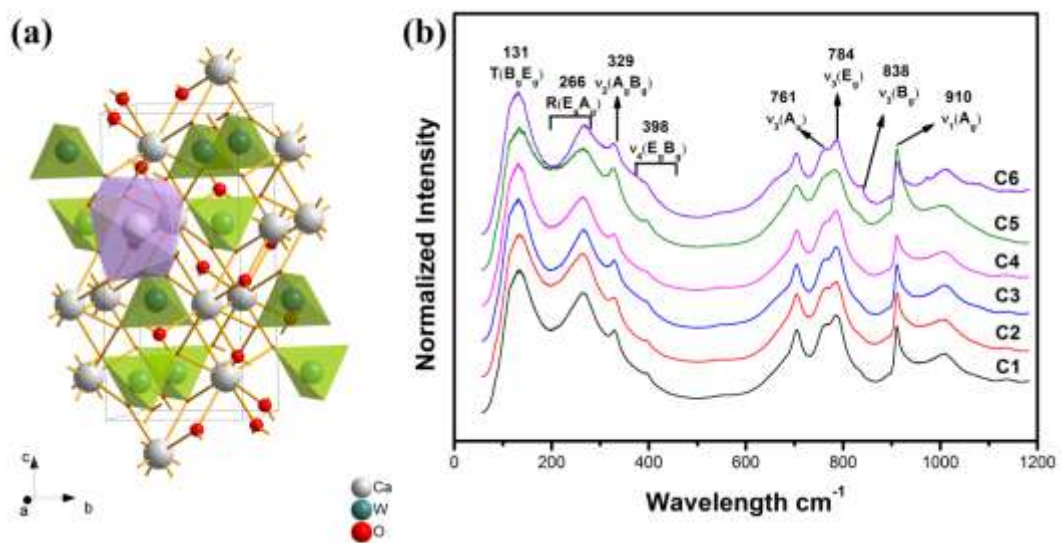

Fig. S1. (a) Unit cells of the standard  $\text{CaWO}_4$  crystal. (b) FT-Raman spectrum of C1-C6 with different morphologies obtained by hydrothermal synthesis.
